# Supplementary material for: Microbial Co-occurrence Relationships in the Human Microbiome
Source: PLoS Comput Biol. 2012 Jul 12;8(7):e1002606. doi: 10.1371/journal.pcbi.1002606 (PMC3395616; doi:10.1371/journal.pcbi.1002606)
Supplement: Figure S1 — Significant co-occurrence and co-exclusion relationships among the abundances of clades in the human microbiome. The network displays all significant phylotype associations within and across the 18 body sites sampled by the HMP. Nodes represent phylotypes (colored according to the body site in which they occur) whereas edges represent significant relationships between phylotypes. Edge thickness reflects the strength of the relationship, and edge color its directionality (green co-occurrence, red co-exclusion). (PDF) [file pcbi.1002606.s001.pdf]

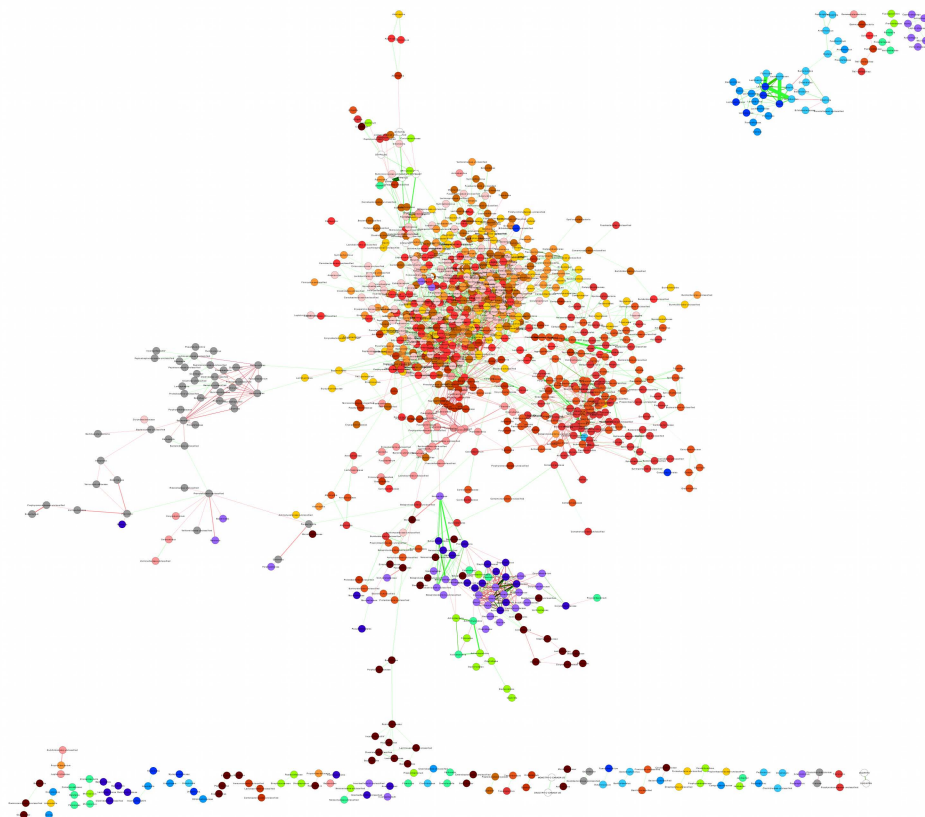

### Node color code

Anterior nares

Buccal mucosa

Hard palate

Keratinized gingiva

Palatine tonsils

Saliva

Subgingival plaque

Supragingival plaque

Throat

Tongue dorsum

Left retroauricular crease

Right retroauricular crease

Left antecubital fossa

Right antecubital fossa

Stool

Mid vagina

Posterior fornix

Vaginal introitus

### Edge color code

positive

negative
