# Supplementary material for: Microbial Co-occurrence Relationships in the Human Microbiome
Source: PLoS Comput Biol. 2012 Jul 12;8(7):e1002606. doi: 10.1371/journal.pcbi.1002606 (PMC3395616; doi:10.1371/journal.pcbi.1002606)
Supplement: Table S2 — Over-representation of associations between organisms in body-site- and clade-specific subnetworks. Over-representation of edges within and between body-site- and clade-specific sub-networks was assessed at the class level by computing edge numbers in 1,000 randomly selected sub-networks of equal node number to the sub-network(s) of interest. This table gives the Bonferroni-corrected p-value and the median edge number of the random sub-networks in brackets in the form (total, p-value, random). Nominally significant values below 0.05 are highlighted in green. Tongue dorsum is the only body site with a significant over-representation of negative edges, and the Bacilli, Bacteroidia and Fusobacteria are the only clades with significant negative relationships. (XLSX) [file pcbi.1002606.s011.xlsx]

## Sheet: body site
Body site	Total phylotype number	Total number of edges between phylotypes	Number of positive edges	Number of negative edges	Total number of within-body-site edges	Number of positive within-body-site edges	Number of negative within-body-site edges	Total number of cross-body-site edges	Number of positive cross-body-site edges	Number of negative cross-body-site edges
Anterior nares	41	56.0 (18.0, 243.0)	39.0 (18.0, 142.0)	17.0 (18.0, 102.0)	31.0 (0.018, 5.0)	22.0 (0.018, 3.0)	9.0 (0.126, 2.0)	25.0 (18.0, 239.0)	17.0 (18.0, 139.0)	8.0 (18.0, 99.5)
Buccal mucosa	53	155.0 (18.0, 312.0)	98.0 (18.0, 180.0)	57.0 (17.964, 129.0)	60.0 (0.018, 8.0)	22.0 (0.018, 5.0)	38.0 (0.018, 3.0)	95.0 (18.0, 303.0)	76.0 (18.0, 176.0)	19.0 (18.0, 126.5)
Hard palate	97	659.0 (1.1682, 560.0)	457.0 (0.018, 324.0)	202.0 (14.9076, 234.0)	202.0 (0.018, 28.0)	128.0 (0.018, 16.0)	74.0 (0.018, 11.0)	457.0 (16.9398, 532.0)	329.0 (4.6386, 307.0)	128.0 (17.964, 223.0)
Keratinized gingiva	39	120.0 (18.0, 229.0)	79.0 (17.928, 133.0)	41.0 (17.928, 96.0)	47.0 (0.018, 4.0)	16.0 (0.018, 2.0)	31.0 (0.018, 2.0)	73.0 (18.0, 225.0)	63.0 (18.0, 130.5)	10.0 (18.0, 95.0)
Left Antecubital fossa	20	29.0 (18.0, 118.0)	19.0 (18.0, 68.0)	10.0 (17.964, 48.0)	7.0 (0.054, 1.0)	7.0 (0.018, 0.0)	0.0 (18.0, 0.0)	22.0 (18.0, 117.0)	12.0 (18.0, 68.0)	10.0 (17.964, 48.0)
Left Retroauricular crease	37	153.0 (17.424, 222.0)	77.0 (17.892, 129.0)	76.0 (13.2534, 92.0)	37.0 (0.018, 4.0)	14.0 (0.018, 2.0)	23.0 (0.018, 1.0)	116.0 (17.964, 218.0)	63.0 (18.0, 127.0)	53.0 (17.298, 90.0)
Mid vagina	18	37.0 (18.0, 106.0)	34.0 (17.766, 63.0)	3.0 (18.0, 43.5)	3.0 (1.4022, 1.0)	1.0 (7.2288, 0.0)	2.0 (1.1862, 0.0)	34.0 (18.0, 105.0)	33.0 (17.802, 62.0)	1.0 (18.0, 43.0)
Palatine Tonsils	87	367.0 (17.892, 510.0)	216.0 (17.838, 293.0)	151.0 (17.604, 215.0)	118.0 (0.018, 23.0)	48.0 (0.018, 13.0)	70.0 (0.018, 10.0)	249.0 (18.0, 487.0)	168.0 (18.0, 279.0)	81.0 (18.0, 206.0)
Posterior fornix	12	46.0 (15.6258, 70.5)	45.0 (7.5348, 41.0)	1.0 (18.0, 29.0)	0.0 (18.0, 0.0)	0.0 (18.0, 0.0)	0.0 (18.0, 0.0)	46.0 (15.5898, 70.0)	45.0 (7.4628, 41.0)	1.0 (18.0, 29.0)
Right Antecubital fossa	18	22.0 (18.0, 106.0)	14.0 (18.0, 63.0)	8.0 (17.964, 43.5)	5.0 (0.108, 1.0)	5.0 (0.036, 0.0)	0.0 (18.0, 0.0)	17.0 (18.0, 105.0)	9.0 (18.0, 62.0)	8.0 (17.964, 43.0)
Right Retroauricular crease	26	141.0 (11.2032, 152.0)	69.0 (15.6078, 88.0)	72.0 (6.0426, 63.0)	25.0 (0.018, 2.0)	4.0 (0.576, 1.0)	21.0 (0.018, 1.0)	116.0 (15.4998, 150.0)	65.0 (16.3098, 87.0)	51.0 (12.8574, 62.0)
Saliva	99	559.0 (10.5372, 575.0)	348.0 (5.5386, 332.0)	211.0 (14.0616, 243.0)	126.0 (0.018, 29.0)	61.0 (0.018, 17.0)	65.0 (0.018, 12.0)	433.0 (17.604, 545.0)	287.0 (14.9256, 315.0)	146.0 (17.892, 231.0)
Stool	49	79.0 (18.0, 292.0)	22.0 (18.0, 168.0)	57.0 (17.928, 122.0)	67.0 (0.018, 7.0)	18.0 (0.018, 4.0)	49.0 (0.018, 3.0)	12.0 (18.0, 285.0)	4.0 (18.0, 164.0)	8.0 (18.0, 119.0)
Subgingival plaque	84	282.0 (18.0, 485.5)	171.0 (18.0, 282.0)	111.0 (17.946, 203.0)	96.0 (0.018, 21.0)	39.0 (0.018, 12.0)	57.0 (0.018, 8.0)	186.0 (18.0, 466.0)	132.0 (18.0, 270.0)	54.0 (18.0, 195.0)
Supragingival plaque	90	382.0 (17.91, 525.0)	245.0 (17.388, 306.0)	137.0 (17.874, 222.0)	152.0 (0.018, 24.0)	73.0 (0.018, 14.0)	79.0 (0.018, 10.0)	230.0 (18.0, 501.0)	172.0 (18.0, 291.0)	58.0 (18.0, 213.0)
Throat	79	457.0 (9.405, 459.0)	254.0 (11.7774, 264.0)	203.0 (7.4808, 193.0)	113.0 (0.018, 19.0)	45.0 (0.018, 11.0)	68.0 (0.018, 8.0)	344.0 (17.55, 440.0)	209.0 (17.172, 254.0)	135.0 (17.172, 185.0)
Tongue dorsum	108	1016.0 (0.018, 622.0)	567.0 (0.018, 359.0)	449.0 (0.036, 263.0)	302.0 (0.018, 35.0)	163.0 (0.018, 20.0)	139.0 (0.018, 15.0)	714.0 (0.27, 588.0)	404.0 (0.432, 340.0)	310.0 (1.0962, 249.0)
Vaginal introitus	26	41.0 (18.0, 152.0)	36.0 (18.0, 88.0)	5.0 (18.0, 63.0)	18.0 (0.018, 2.0)	14.0 (0.018, 1.0)	4.0 (0.594, 1.0)	23.0 (18.0, 150.0)	22.0 (18.0, 87.0)	1.0 (18.0, 62.0)

## Sheet: class
Class	Total number of class members	Total number of edges between class members	Number of positive edges	Number of negative edges	Total number of within-class edges	Number of positive within-class edges	Number of negative within-class edges	Total number of cross-class edges	Number of positive cross-class edges	Number of negative cross-class edges
Actinobacteria	103	432.0 (14.955, 593.0)	183.0 (15.0, 342.5)	249.0 (7.6425, 249.5)	72.0 (0.015, 32.0)	66.0 (0.015, 18.0)	6.0 (14.2215, 13.0)	360.0 (15.0, 561.0)	117.0 (15.0, 324.0)	243.0 (6.699, 236.5)
Bacilli	123	731.0 (5.0055, 700.5)	240.0 (15.0, 407.0)	491.0 (0.015, 295.5)	133.0 (0.015, 46.0)	127.0 (0.015, 27.0)	6.0 (14.94, 19.0)	598.0 (12.648, 656.0)	113.0 (15.0, 379.0)	485.0 (0.015, 276.0)
Bacteroidia	105	688.0 (1.4085, 608.0)	335.0 (10.3845, 351.0)	353.0 (0.105, 255.5)	120.0 (0.015, 33.0)	108.0 (0.015, 19.0)	12.0 (9.8895, 14.0)	568.0 (8.346, 575.0)	227.0 (15.0, 332.5)	341.0 (0.015, 242.0)
Betaproteobacteria	79	310.0 (15.0, 463.0)	176.0 (15.0, 268.0)	134.0 (14.58, 195.0)	109.0 (0.015, 19.0)	107.0 (0.015, 11.0)	2.0 (14.79, 8.0)	201.0 (15.0, 445.0)	69.0 (15.0, 256.0)	132.0 (14.46, 187.5)
Clostridia	243	1142.0 (14.805, 1302.0)	663.0 (14.775, 752.0)	479.0 (14.1315, 551.0)	288.0 (0.015, 182.0)	276.0 (0.015, 105.0)	12.0 (15.0, 76.0)	854.0 (15.0, 1122.0)	387.0 (15.0, 646.0)	467.0 (8.901, 474.0)
Epsilonproteobacteria	30	128.0 (13.9815, 179.0)	112.0 (5.0505, 103.0)	16.0 (15.0, 75.0)	53.0 (0.015, 2.0)	53.0 (0.015, 1.0)	0.0 (15.0, 1.0)	75.0 (15.0, 177.0)	59.0 (14.955, 102.0)	16.0 (15.0, 74.0)
Erysipelotrichi	12	22.0 (14.985, 69.0)	18.0 (14.895, 41.0)	4.0 (14.925, 27.0)	2.0 (1.1085, 0.0)	2.0 (0.405, 0.0)	0.0 (15.0, 0.0)	20.0 (15.0, 68.5)	16.0 (14.955, 41.0)	4.0 (14.925, 27.0)
Flavobacteria	26	133.0 (11.1495, 155.0)	63.0 (14.295, 88.5)	70.0 (6.099, 64.0)	10.0 (0.06, 2.0)	10.0 (0.015, 1.0)	0.0 (15.0, 1.0)	123.0 (12.303, 153.5)	53.0 (14.805, 88.0)	70.0 (5.889, 64.0)
Fusobacteria	51	418.0 (0.135, 302.0)	205.0 (1.7085, 173.5)	213.0 (0.075, 126.0)	58.0 (0.015, 7.0)	58.0 (0.015, 4.0)	0.0 (15.0, 3.0)	360.0 (1.2135, 295.0)	147.0 (12.678, 169.0)	213.0 (0.045, 123.0)
Gammaproteobacteria	69	180.0 (15.0, 406.0)	97.0 (15.0, 235.0)	83.0 (14.955, 171.0)	59.0 (0.015, 14.0)	57.0 (0.015, 8.0)	2.0 (14.25, 6.0)	121.0 (15.0, 392.0)	40.0 (15.0, 227.0)	81.0 (14.97, 165.0)
Mollicutes	6	9.0 (14.955, 34.0)	9.0 (14.2365, 20.0)	0.0 (15.0, 13.0)	4.0 (0.015, 0.0)	4.0 (0.015, 0.0)	0.0 (15.0, 0.0)	5.0 (15.0, 34.0)	5.0 (15.0, 20.0)	0.0 (15.0, 13.0)
Negativicutes	8	35.0 (10.7895, 45.0)	30.0 (6.264, 27.0)	5.0 (14.265, 18.0)	1.0 (2.0385, 0.0)	1.0 (1.1535, 0.0)	0.0 (15.0, 0.0)	34.0 (11.0145, 45.0)	29.0 (6.788, 27.0)	5.0 (14.265, 18.0)
Spirochaetes	23	63.0 (14.985, 136.0)	54.0 (14.0865, 78.0)	9.0 (15.0, 56.0)	14.0 (0.015, 1.0)	14.0 (0.015, 1.0)	0.0 (15.0, 0.0)	49.0 (14.985, 134.0)	40.0 (14.91, 77.0)	9.0 (15.0, 55.0)
Synergistia	2	5.0 (11.808, 9.0)	5.0 (9.156, 5.0)	0.0 (15.0, 3.0)	0.0 (15.0, 0.0)	0.0 (15.0, 0.0)	0.0 (15.0, 0.0)	5.0 (11.808, 9.0)	5.0 (9.156, 5.0)	0.0 (15.0, 3.0)
Verrucomicrobiae	2	4.0 (12.8115, 9.0)	0.0 (15.0, 5.0)	4.0 (6.729, 3.0)	0.0 (15.0, 0.0)	0.0 (15.0, 0.0)	0.0 (15.0, 0.0)	4.0 (12.8115, 9.0)	0.0 (15.0, 5.0)	4.0 (6.729, 3.0)
